# Supplementary material for: RNA Docking and Local Translation Regulate Site-Specific Axon Remodeling In Vivo
Source: PubMed Central journal article supplement (PMC5563073; doi:10.1016/j.neuron.2017.07.016), 2017-08-16
Supplement: mmc1.pdf [file mmc1.pdf]

**Neuron, Volume 95**

## **Supplemental Information**

### **RNA Docking and Local Translation**

#### **Regulate Site-Specific Axon Remodeling In Vivo**

**Hovy Ho-Wai Wong, Julie Qiaojin Lin, Florian Ströhl, Cláudio Gouveia Roque, Jean-Michel Cioni, Roberta Cagnetta, Benita Turner-Bridger, Romain F. Laine, William A. Harris, Clemens F. Kaminski, and Christine E. Holt**

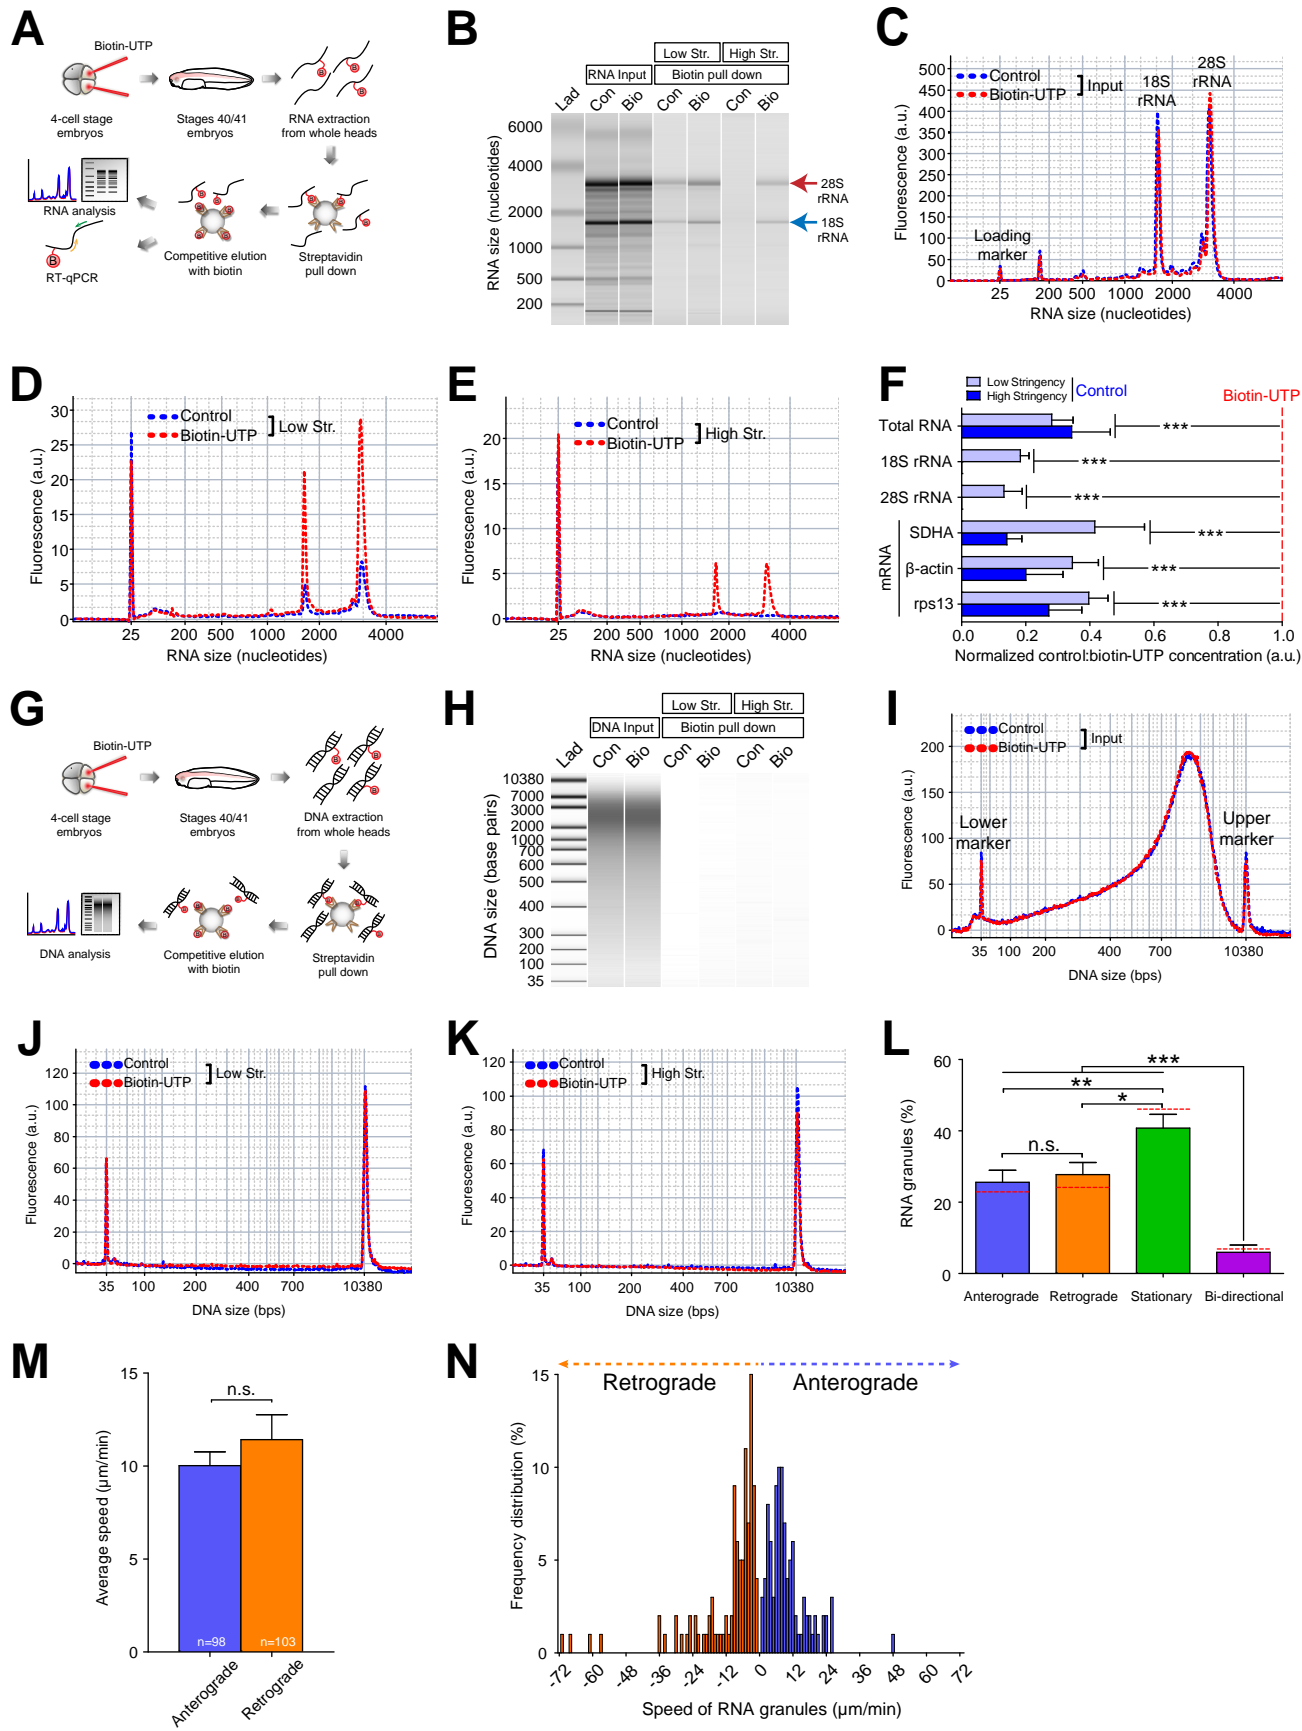

Figure S1

**Figure S1. Related to Figure 1. UTP Analogue Incorporates into mRNA and rRNA, but Not DNA, *in vivo***

(A) Introduction of biotin-UTP into the CNS prior to RNA extraction and streptavidin pull down for Bioanalyzer analysis and RT-qPCR. (B) RNA gel image from the Bioanalyzer analysis. Str., Stringency; Lad, ladder; Con, control; Bio, biotin-UTP. (C) Electropherogram showing that the global RNA patterns are similar for the input of control (blue) and biotin-UTP (red) conditions. (D and E) Electropherograms displaying the enrichment of RNA in the biotin-UTP condition with both the low (D) and high (E) stringency pull down protocols. (F) Bar charts presenting the enrichment of total RNA ( $F_{1,8}=99.67$ ,  $p<0.0001$ ), 18S rRNA ( $F_{1,8}=4601$ ,  $p<0.0001$ ), 28S rRNA ( $F_{1,8}=1087$ ,  $p<0.0001$ ), SDHA mRNA ( $F_{1,7}=158.9$ ,  $p<0.0001$ ),  $\beta$ -actin mRNA ( $F_{1,8}=105.4$ ,  $p<0.0001$ ) and rps13 mRNA ( $F_{1,8}=125.1$ ,  $p<0.0001$ ) in the biotin-UTP condition over control condition with both the low and high stringency pull down protocols. (G) Introduction of biotin-UTP into the CNS prior to genomic and mitochondrial DNA extraction and streptavidin pull down for Bioanalyzer analysis. (H) DNA gel image from the Bioanalyzer analysis. (I) Electropherogram showing the global DNA patterns are similar for the input of control (blue) and biotin-UTP (red) conditions. (J and K) Electropherograms showing no obvious DNA peak was detected in either control or biotin-UTP condition with both the low (J) and high (K) stringency pull down protocols. (L) The proportions of RNA motion in 20 individual axons are displayed as bars ( $F_{3,76}=19.7$ ,  $p<0.0001$ ). The proportions of RNA motion pooled together from all RNA granules ( $n=319$ ) are displayed as red dotted lines. (M) Average speed of anterograde and retrograde trafficking of RNA granules ( $U=4463$ ,  $p=0.16$ , Mann Whitney test). (N) Frequency distribution of the speed of RNA granules trafficked in the anterograde and retrograde directions. Error bars represent SEM. \* $p<0.05$ , \*\* $p<0.01$ , \*\*\* $p<0.001$  (two-way ANOVA for (F)) (one-way ANOVA with Tukey multiple comparisons test for (L)).

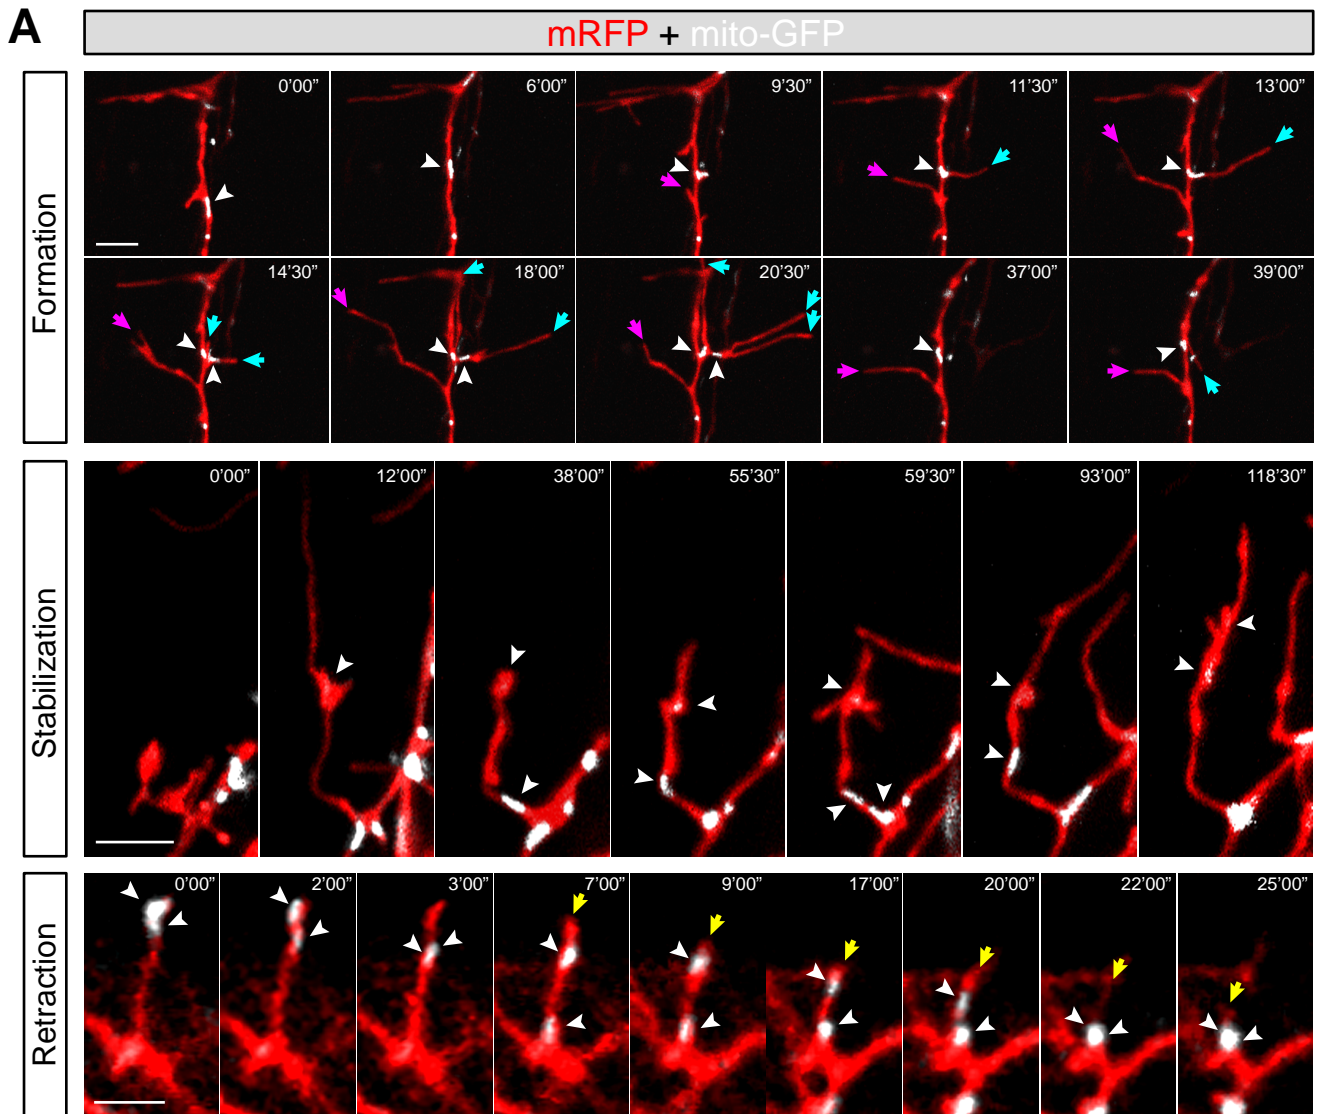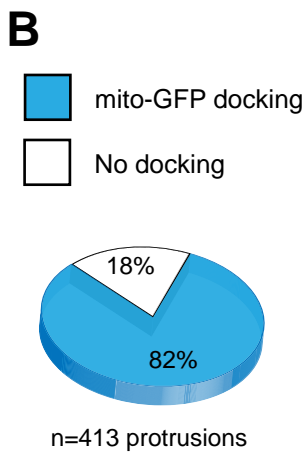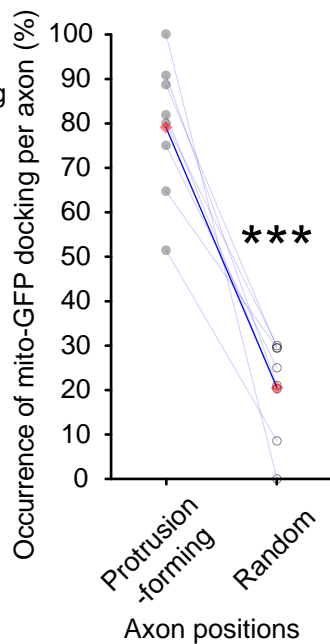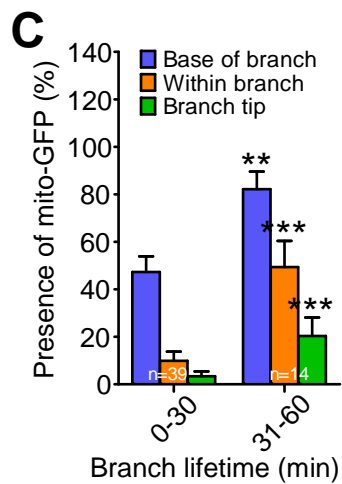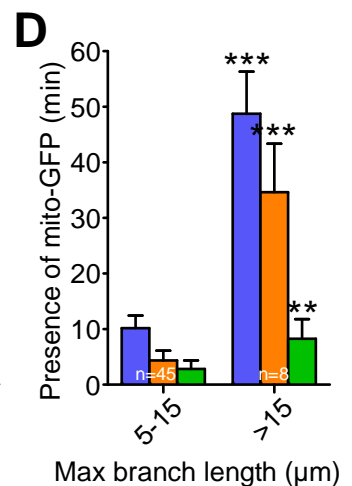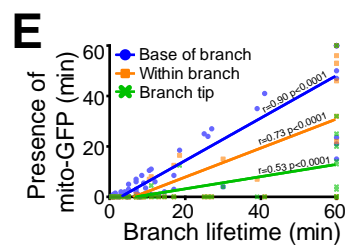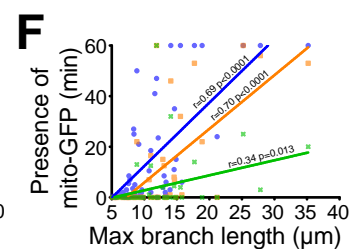

Figure S2

**Figure S2. Related to Figure 1. Mitochondria Localization at Specific Axonal Sites Correlates with Branching *in vivo***

(A) Time-lapse images illustrating mitochondria labeled with mito-GFP (white arrowheads) docking in RGC axons during branching. (Upper panel) A branch was formed (magenta arrows) shortly after the departure of the mitochondrion. The accumulation of mitochondria at specific axonal sites also promoted the formation of branches (cyan arrows). (Middle panel) Mitochondria moved into branches and to branch tips during protrusion stabilization. (Bottom panel) Branch retraction (yellow arrow) occurred shortly after mitochondria had moved out of the branch. (B) (Left panel) Proportion of protrusions with mitochondria docking at the base  $\geq 1$ min preceding protrusion formation. (Right panel) Occurrence of mitochondria docking in protrusion-forming or random positions in the same axons ( $t_7=8.3$ ,  $p<0.0001$ , paired t test). Red diamonds represent the averages. (C) Time of mitochondria present at different branch positions (normalized to branch lifetime) were higher in branches with longer lifetime (base of branch:  $U=146$ ,  $p=0.0088$ ; within branch:  $U=116$ ,  $p=0.0002$ ; branch tip:  $U=145$ ,  $p=0.0004$ ). (D) Time of mitochondria present at different branch positions were higher in branches with longer maximal branch length (base of branch:  $U=26.5$ ,  $p<0.0001$ ; within branch:  $U=46$ ,  $p<0.0001$ ; branch tip:  $U=95.5$ ,  $p=0.0044$ ). Error bars represent SEM.  $**p<0.01$ ,  $***p<0.001$  (Mann Whitney test for C-D). (E) Correlation between time of mitochondria present at different branch positions and lifetime of branch (base of branch:  $r=0.90$ ; within branch:  $r=0.73$ ; branch tip:  $r=0.53$ ,  $p<0.0001$  for all groups). (F) Correlation between time of mitochondria present at different branch positions and maximal branch length (base of branch:  $r=0.69$ ,  $p<0.0001$ ; within branch:  $r=0.70$ ,  $p<0.0001$ ; branch tip:  $r=0.34$ ,  $p=0.013$ , Pearson's correlation for (E and F)). Scale bars,  $5\mu\text{m}$ .

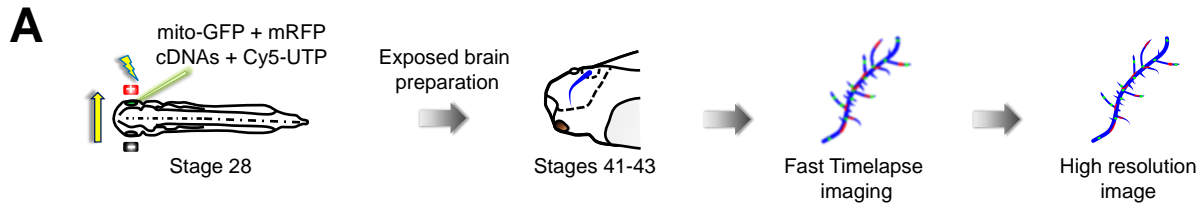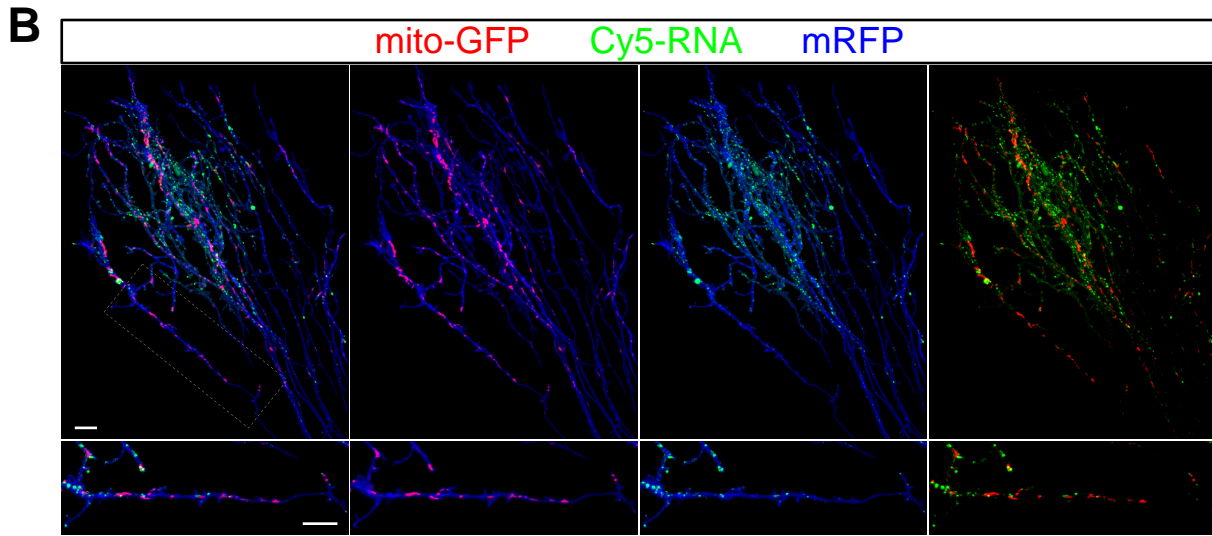

**C**

| Brain # | R(obs) | Image scrambling |                 |                |
|---------|--------|------------------|-----------------|----------------|
|         |        | Iterations       | R(rand) mean±sd | R(rand)>R(obs) |
| 1       | -0.016 | 1000             | 0.468±0.001     | 1000/1000      |
| 2       | 0.004  | 1000             | 0.504±0.001     | 1000/1000      |
| 3       | 0.113  | 1000             | 0.401±0.001     | 1000/1000      |
| 4       | 0.176  | 1000             | 0.368±0.001     | 1000/1000      |
| 5       | 0.048  | 1000             | 0.458±0.001     | 1000/1000      |
| 6       | -0.094 | 1000             | 0.478±0.001     | 1000/1000      |
| 7       | -0.039 | 1000             | 0.443±0.001     | 1000/1000      |
| 8       | 0.058  | 1000             | 0.367±0.001     | 1000/1000      |
| 9       | -0.033 | 1000             | 0.456±0.001     | 1000/1000      |
| 10      | 0.051  | 1000             | 0.440±0.001     | 1000/1000      |
| 11      | 0.136  | 1000             | 0.420±0.001     | 1000/1000      |

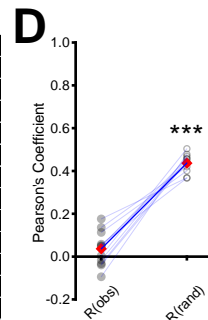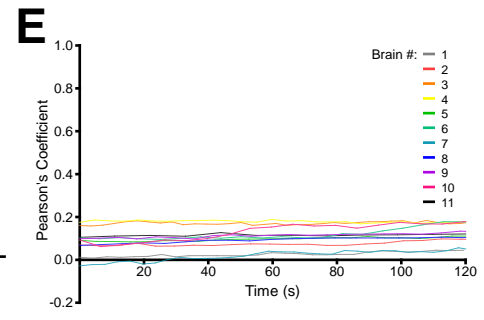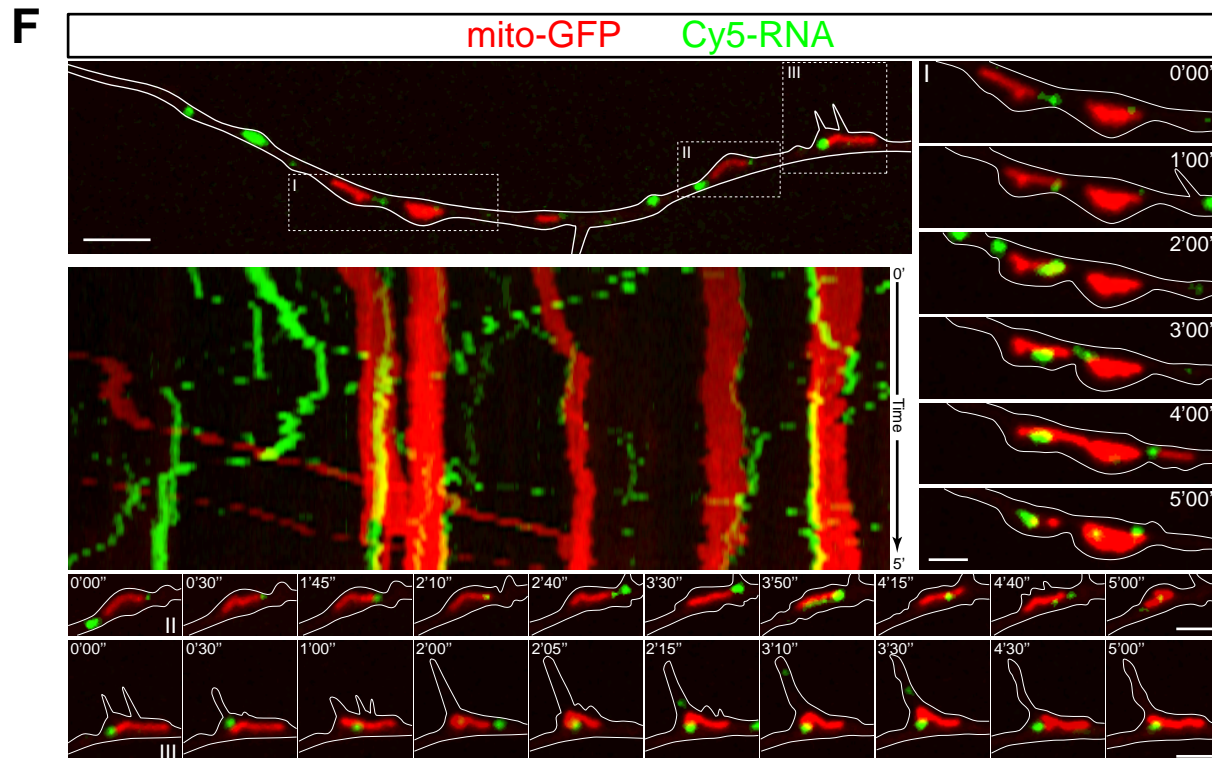

Figure S3

### Figure S3. Related to Figure 1. Cy5-RNA and Mitochondria Are Distinct Structures

(A) Schematic of introducing Cy5-UTP, mito-GFP cDNA and mRFP cDNA into the RGCs with targeted eye electroporation. Fast *in vivo* time-lapse imaging of RNA granules, mitochondria and cell morphology was carried out for 2 minutes. This was followed by capturing a high resolution image stack of the axon arbors *in vivo*. (B) A high resolution image stack showing the localization of RNA granules and mitochondria in axon arbors. The RNA granules and mitochondria seldom showed colocalization but are often seen to juxtapose each other. (C) A table showing the Pearson's correlation coefficient (R) for Cy5-RNA and mito-GFP in the high resolution image stacks of 11 brains. Each image stack was individually scrambled to create 1000 random images. In all cases, the R(rand) yielded from the 1000 scrambled images were higher than the observed R(obs), robustly indicating that none of the samples showed a higher colocalization of the Cy5-RNA and mito-GFP than expected from chance. (D) The averages of R(rand) yielded from 1000 scrambled images were significantly higher than their R(obs) from the original high resolution image stacks ( $t_{10}=11.25$ ,  $p<0.0001$ , paired t test), supporting that the Cy5-RNA and mitochondria are distinct structures. (E) A line graph illustrating the Costes Pearson's correlation coefficient remains low and similar across time from the time-lapse images (average image intervals=  $5.8\pm 0.6$ s per z-stack), supporting the observed low R(obs) in the high resolution image stack were not "artifacts" from a snapshot. (F) Time-lapse images showing the localizing of RNA granules and mitochondria in an RGC axon of eye explant. The kymograph and time series I, II and III show that Cy5-RNA and mitochondria are distinct structures and often juxtapose each other, reflecting potential interaction may exist. Error bars represent SEM. \*\*\* $p<0.001$ . Scale bars, 10 $\mu$ m for (B), 5 $\mu$ m for (F) overview image and 2 $\mu$ m for (F) time series I, II and III.

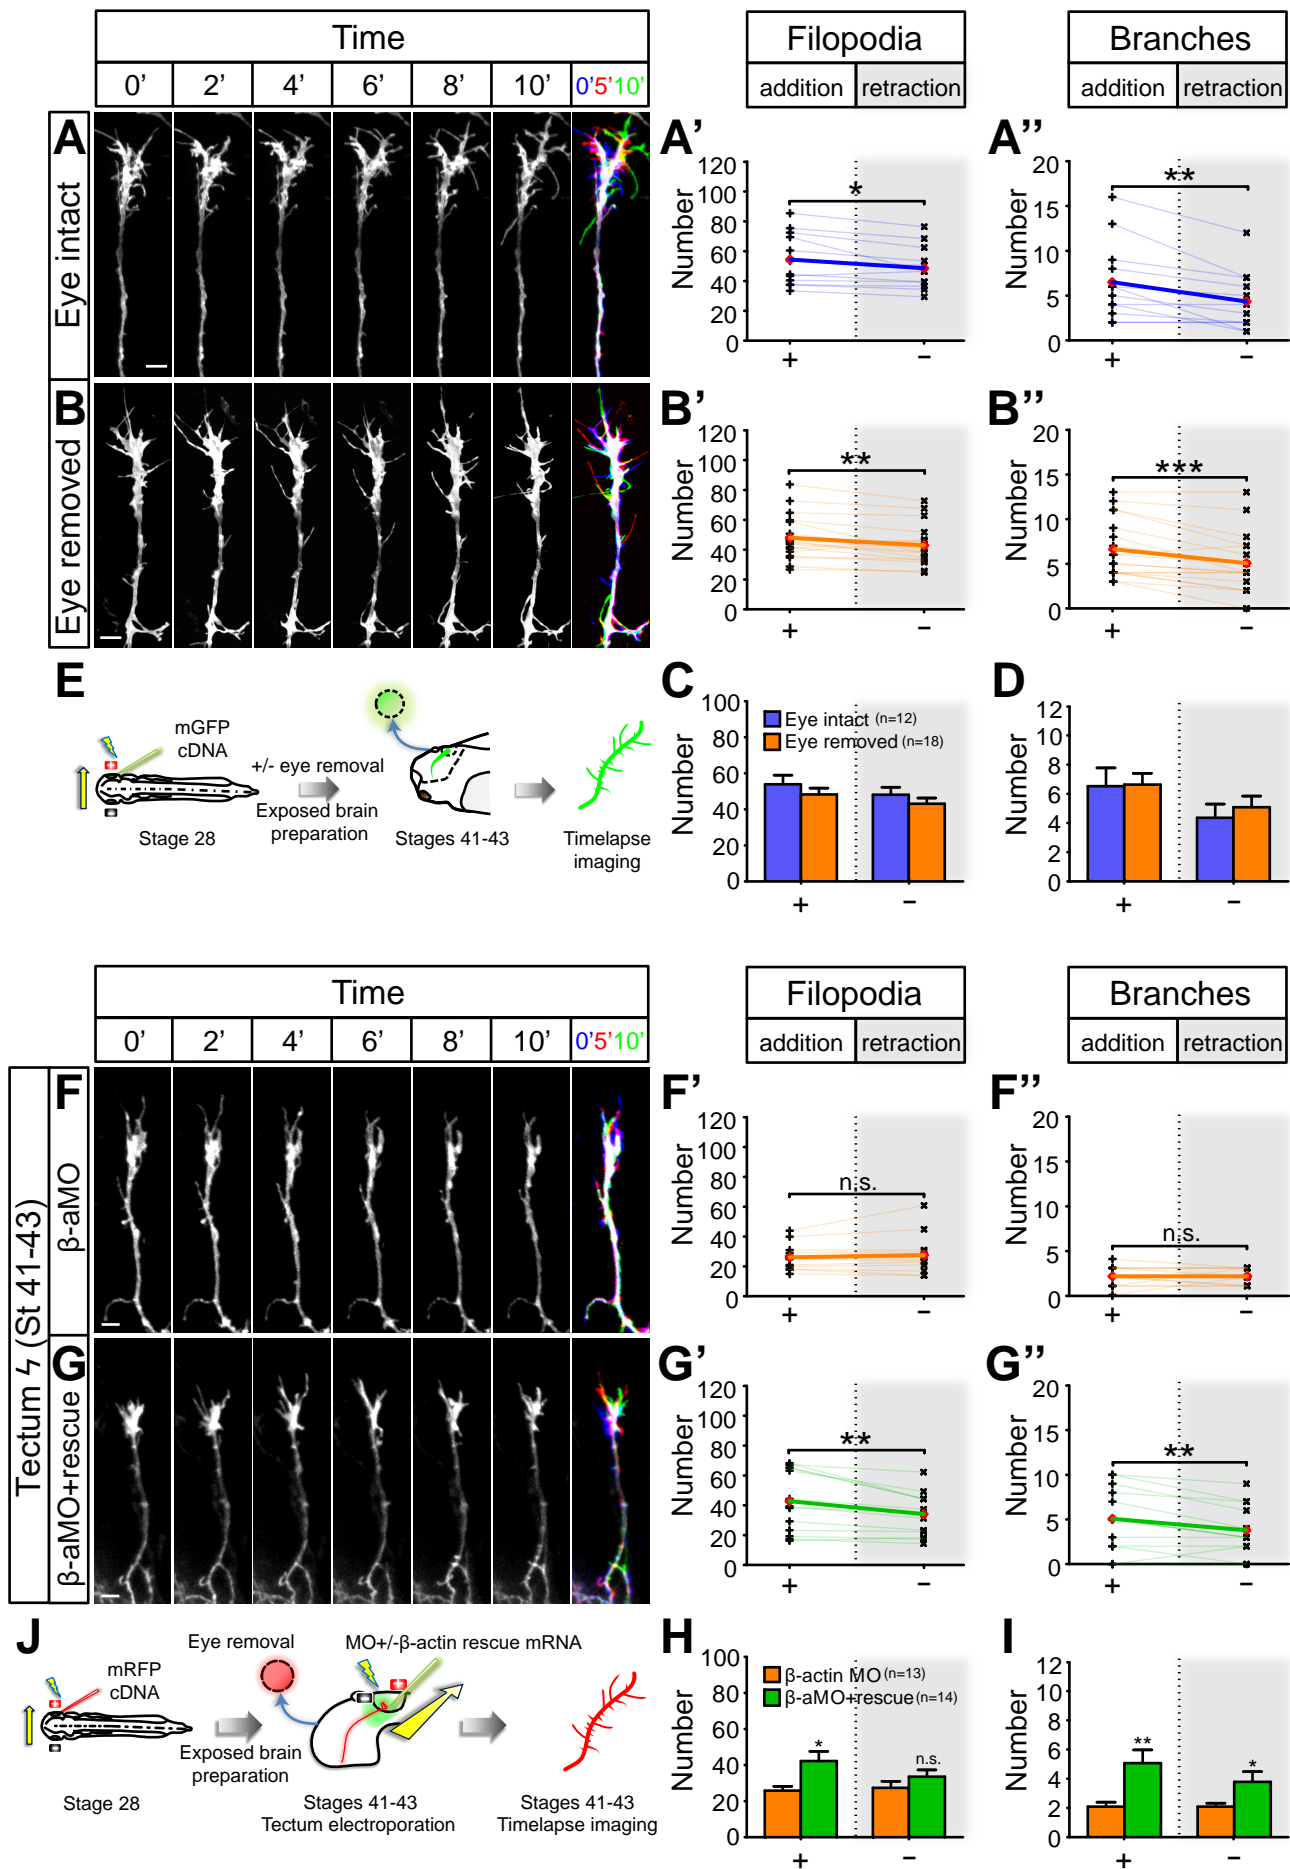

Figure S4



**Figure S4. Related to Figure 2 and 5. Axonal Branching Dynamics Remains Normal after Eye Removal and Branching Dynamics Defects Resulted from Local Inhibition of  $\beta$ -actin Translation are Rescued by Co-delivery of  $\beta$ -actin mRNA**

(A and B) Time-lapse images of axonal branching in embryos with eye (soma of RGC axons) intact (A) and removed (B). (A' and A'') Higher number of filopodia and branches were added than removed in embryos with eye intact (filopodia:  $t_{11}=3.1$ ,  $p=0.01$ ; branches:  $t_{11}=3.8$ ,  $p=0.003$ ). (B' and B'') Higher number of filopodia and branches were added than removed in embryos with eye removed (filopodia:  $t_{17}=3.4$ ,  $p=0.003$ ; branches:  $t_{17}=4.6$ ,  $p=0.0002$ ). (C and D) The addition and removal of filopodia (C; addition:  $t_{28}=0.95$ ,  $p=0.35$ ; removal:  $t_{28}=0.97$ ,  $p=0.34$ ) and branches (D; addition:  $t_{28}=0.08$ ,  $p=0.94$ ; removal:  $t_{28}=0.60$ ,  $p=0.56$ ) were unaffected after the removal of the eye. (E) Schematic of live imaging experiment on branching dynamics of RGC axons with eye intact/removed. (F and G) Time-lapse images of axon branching in the tectum after local delivery of  $\beta$ -actin MO (+/-  $\beta$ -actin rescue mRNA [0.5 $\mu$ M]) at stages 41-43. (F' and F'') No significant differences were observed in the number of filopodia and branches that were added and removed after local delivery of  $\beta$ -actin MO ( $\beta$ -aMO) (addition:  $t_{12}=1.1$ ,  $p=0.30$ ; removal:  $t_{12}=0$ ,  $p=1$ ). (G' and G'') The loss of the addition:removal biases of filopodia and branches after local delivery of  $\beta$ -aMO were rescued with local co-delivery of  $\beta$ -aMO resistant rescue mRNA. (filopodia:  $t_{13}=3.9$ ,  $p=0.002$ ; branches:  $t_{13}=3.3$ ,  $p=0.005$ ). (H) The addition of filopodia was rescued with  $\beta$ -actin rescue mRNA ( $t_{25}=2.7$ ,  $p=0.01$ ). Despite a trend of rescue was seen for the removal of filopodia, it was not statically significant (removal:  $t_{25}=1.2$ ,  $p=0.24$ ). (I) The addition and removal of filopodia and branches were rescued with  $\beta$ -actin rescue mRNA (D; addition:  $t_{25}=3.0$ ,  $p=0.006$ ; removal:  $t_{25}=2.2$ ,  $p=0.04$ ). (J) Schematic showing the local delivery of  $\beta$ -actin MO (+/-  $\beta$ -actin rescue mRNA) into RGC axons by tectum electroporation and imaged immediately thereafter. Electroporated eye was removed to eliminate somatic contribution of cytoplasmic material. Error bars represent SEM. \* $p<0.01$ , \*\* $p<0.01$ , \*\*\* $p<0.001$  (paired t test for (A, B, F and G) and unpaired t test for (C, D, H and I). Scale bars, 5 $\mu$ m. Red diamonds represent the averages (A, B, F and G).

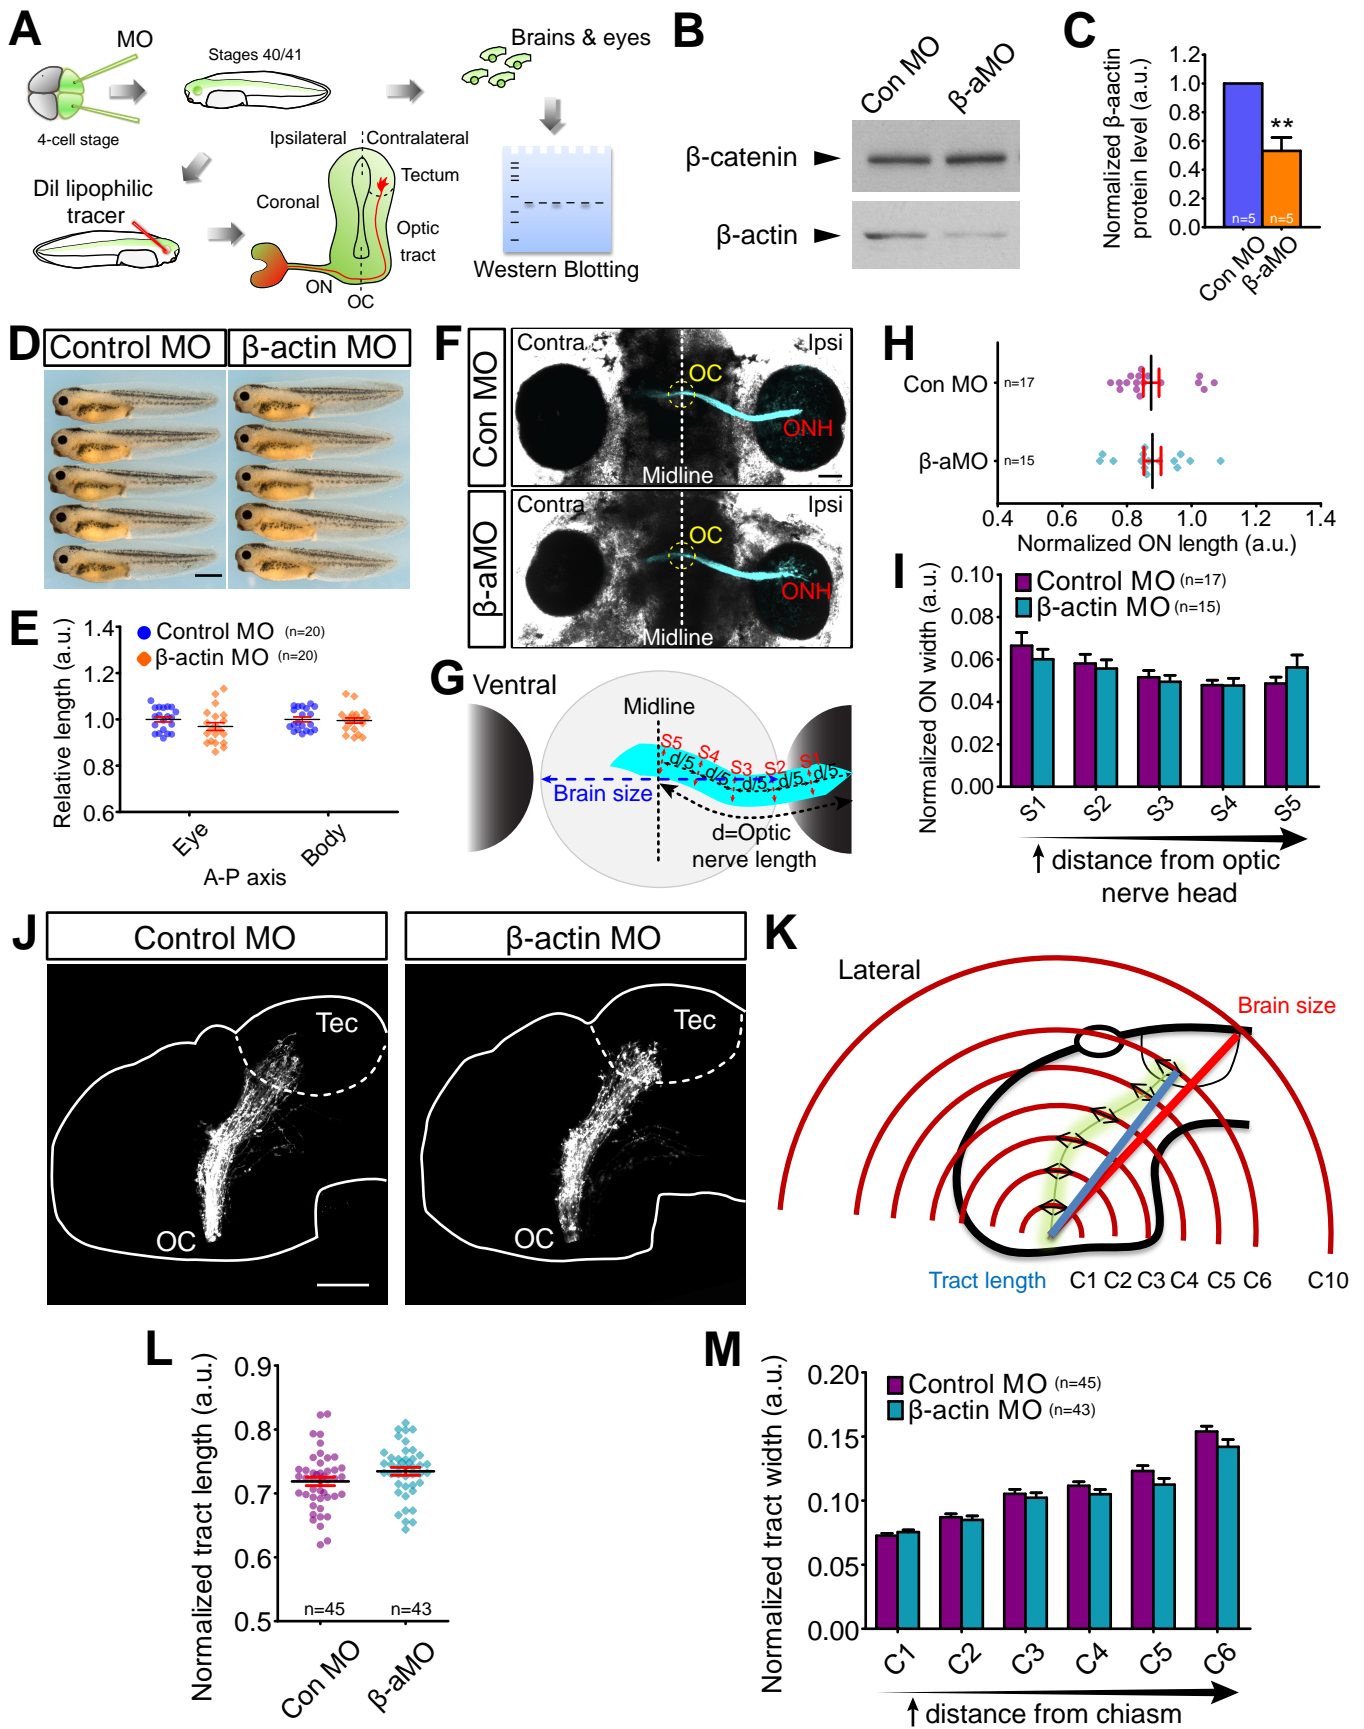

Figure S5

**Figure S5. Related to Figure 4. Embryo Remains Grossly Normal after  $\beta$ -actin Knockdown**

(A) Schematic of MO injection into dorsal animal blastomeres at 4-cell stage. Injected embryos at Stage 41 were then used for anterograde tracing of RGC axons with lipophilic dye or protein harvesting of brain and eyes for western blot analysis. (B) Western blot showing  $\beta$ -actin was markedly reduced in the  $\beta$ -actin knockdown condition compared to control.  $\beta$ -catenin served as a loading control. (C) Normalized ratiometric measure of  $\beta$ -actin knockdown efficiency from western blot analyses ( $t_4=5.0$ ,  $p=0.0073$ , paired t test). (D) Brightfield images showing that the morphology of  $\beta$ -actin morphants and their eyes being grossly normal. (E) Quantification of the length of eye ( $t_{38}=1.5$ ,  $p=0.14$ ) and body ( $t_{38}=0.3$ ,  $p=0.76$ ) in the anterior-posterior axis displaying no significant differences. (F) Images from ventral perspective of the brain showing the RGC axon bundles projecting from the optic nerve head (ONH) to the optic chiasm (OC) were indiscernible between control and  $\beta$ -actin morphants. (G) Schematic illustrating the quantification of the length and width of optic nerve. The optic nerve length ( $d$ ) is defined by the length of the optic nerve (ON) from the ONH to the midline. The length was then divided into 5 sections (S1-S5), which are points where the width of the optic nerve was measured perpendicularly to the length axis. Both the length and width of the ON were then normalized to the brain size, which is defined by the straight line from the point of the brain adjacent to the center of the eye to the midline of the brain. (H) Scatter graph showing that the length of the ON from the ONH to the midline did not differ between the control and  $\beta$ -actin morphants ( $t_{30}=0.1$ ,  $p=0.91$ ). (I) The ON width did not differ between the control and  $\beta$ -actin morphants across the length of the ON from the ONH to the midline (S1:  $t_{30}=0.8$ ,  $p=0.43$ ; S2:  $t_{30}=0.4$ ,  $p=0.70$ ; S3:  $t_{30}=0.5$ ,  $p=0.64$ ; S4:  $t_{30}=0.04$ ,  $p=0.97$ ; S5:  $t_{30}=1.2$ ,  $p=0.24$ ). (J) Images from the lateral perspective of the contralateral hemisphere of brain showing that retinotectal projection from the OC to the optic tectum were indiscernible between control and  $\beta$ -actin morphants. (K) Schematic illustrating the quantification of the length and width of optic tract. The optic tract length is defined by a straight line from the OC to the distal axon terminals of the optic tract. Ten equally spaced concentric circles (C1-C10) were overlaid on the tract images with the center of the circles overlying the OC and C10 overlying the dorsal-posterior tectal boundary. Both the length and width of tract were then normalized to the brain size, which is defined by the straight line from the OC to the dorsal-posterior tectal boundary. (L) Scatter graph showing that the length of the optic tract did not differ between the control and  $\beta$ -actin morphants ( $t_{86}=1.7$ ,  $p=0.086$ ). (M) The optic tract width did not differ between the control and  $\beta$ -actin morphants across the length of the optic tract (C1:  $t_{86}=1.1$ ,  $p=0.27$ ; C2:  $t_{86}=0.5$ ,  $p=0.62$ ; C3:  $t_{86}=0.6$ ,  $p=0.56$ ; C4:  $t_{86}=1.4$ ,  $p=0.17$ ; C5:  $t_{86}=1.7$ ,  $p=0.10$ ; C6:  $t_{86}=1.7$ ,  $p=0.092$ ). Error bars represent SEM. \*\* $p<0.01$  (unpaired t test for (E, H, I, L and M)). Scale bars: 1mm for (D) and 100 $\mu$ m for (F and J).

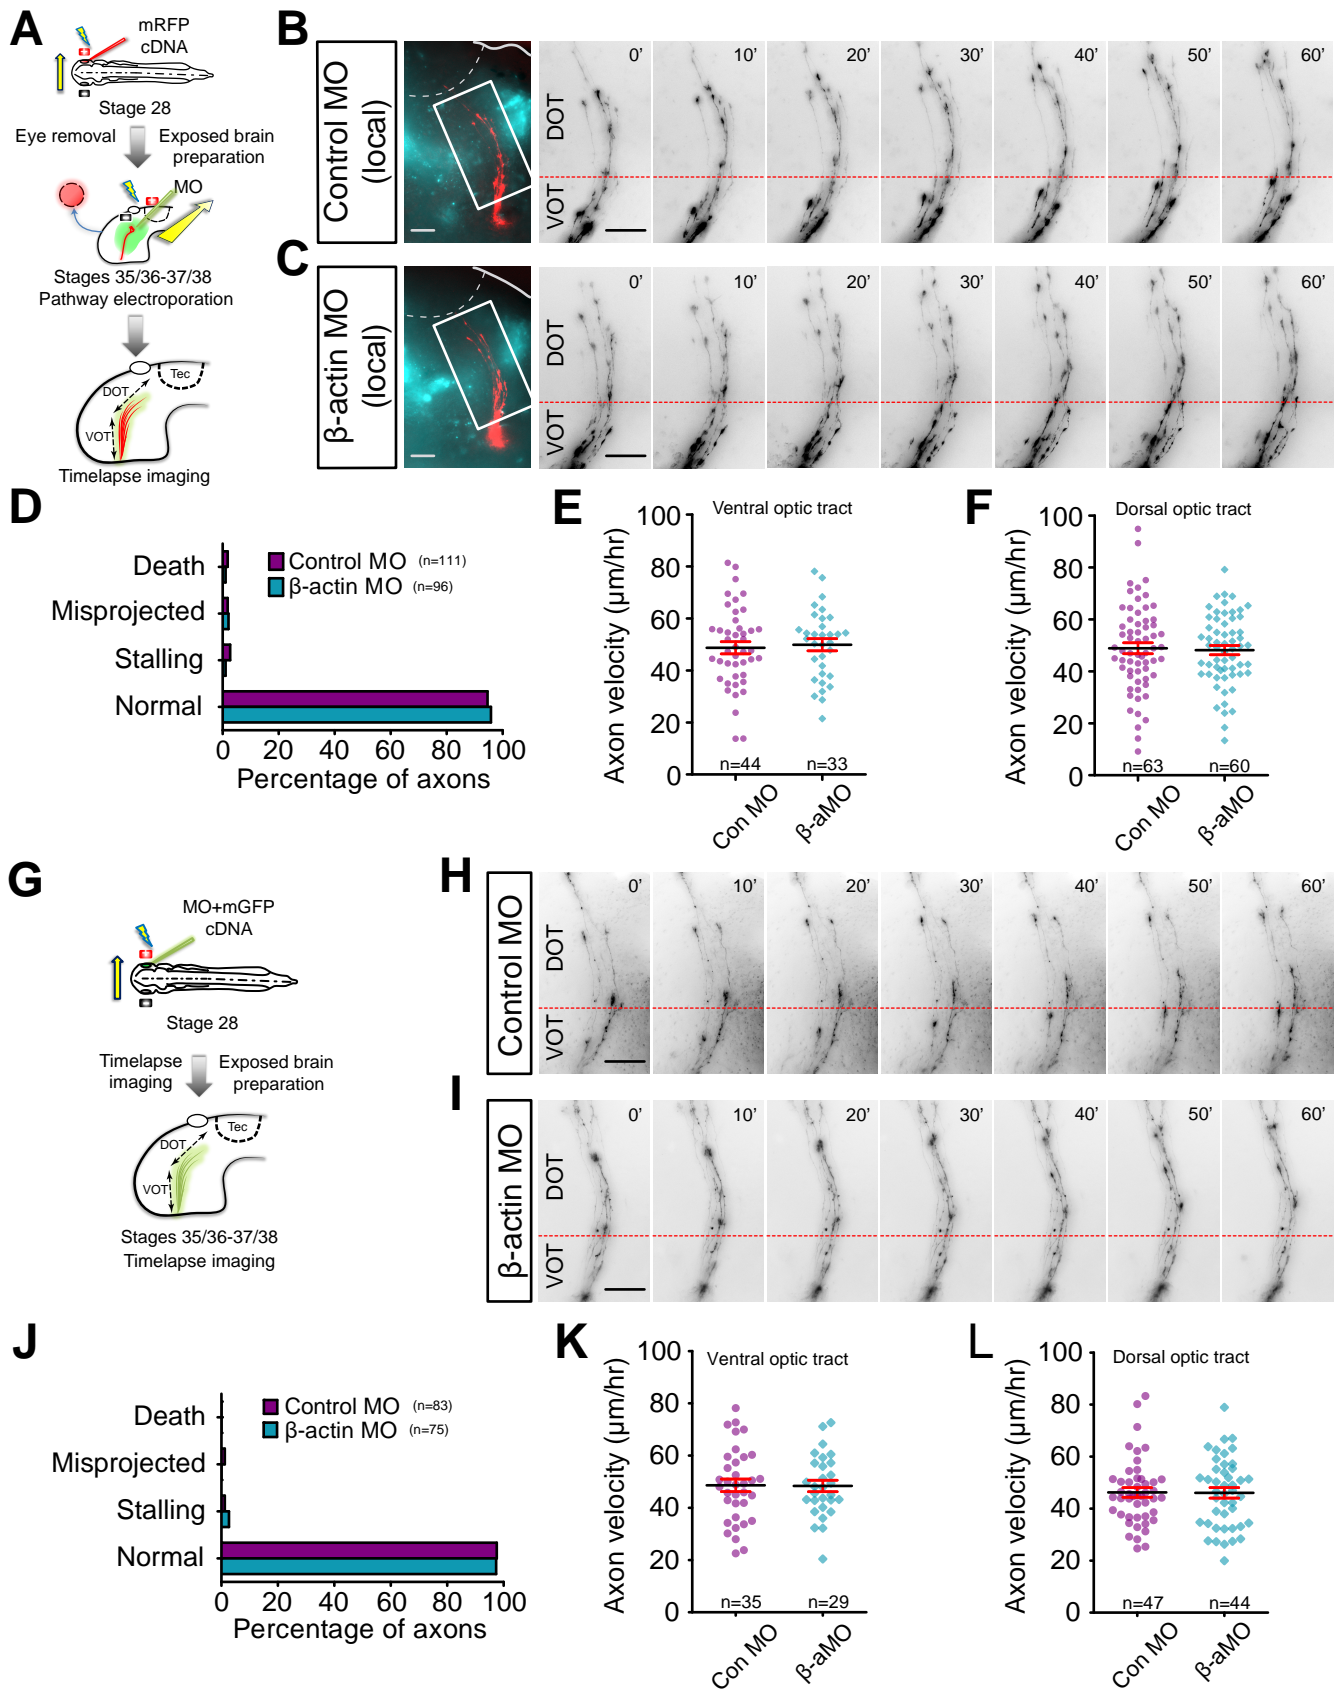

Figure S6

**Figure S6. Related to Figure 5. Local Inhibition of  $\beta$ -actin Translation Does Not Grossly Affect Axon Navigation in the Optic Tract**

(A) Schematic showing the local delivery of MO into RGC axons by pathway electroporation. The eye electroporated with mRFP plasmids was removed to eliminate somatic contribution of cytoplasmic material. The embryos were imaged immediately after local delivery of MO to ensure any observed effect would be a result of acute blockage of local  $\beta$ -actin translation. (B and C) Time-lapse images of RGC axons navigating through the ventral optic tract (VOT) and dorsal optic tract (DOT) after local Con MO (B) or  $\beta$ -actin MO (C) delivery. MO is shown in cyan and axons are shown in red on the left. (D) Axon behaviors during navigation were unaffected in axons with local  $\beta$ -actin MO delivery (death:  $p=1$ ; misprojected:  $p=1$ ; stalling:  $p=0.63$ ; normal:  $p=0.75$ ). (E and F) Axon navigation velocities in both the VOT (E) and DOT (F) were unaffected local  $\beta$ -actin MO delivery. (VOT:  $t_{75}=0.3$ ,  $p=0.73$ ; DOT:  $t_{121}=0.3$ ,  $p=0.80$ ). (G) Schematic showing eye electroporation and live imaging of axon navigation. (H and I) Time-lapse images of axon navigation through the ventral optic tract (VOT) and dorsal optic tract (DOT) of Con MO- and  $\beta$ -actin MO-positive RGC axons. (J) Axon behaviors during navigation were unaffected in axons from the  $\beta$ -actin MO condition. (misprojected:  $p=1$  stalling:  $p=0.6$ ; normal:  $p=1$ ) (K and L) Axon navigation velocities in both the VOT (K) and DOT (L) were unaffected after  $\beta$ -actin knockdown in RGCs (VOT:  $t_{62}=0.07$ ,  $p=0.94$ ; DOT:  $t_{89}=0.09$ ,  $p=0.95$ ). Error bars represent SEM. (Fisher's exact test for (D and J)). (unpaired t test for (E, F, K and L)). Scale bars,  $50\mu\text{m}$  for (B, C, H and I).

A

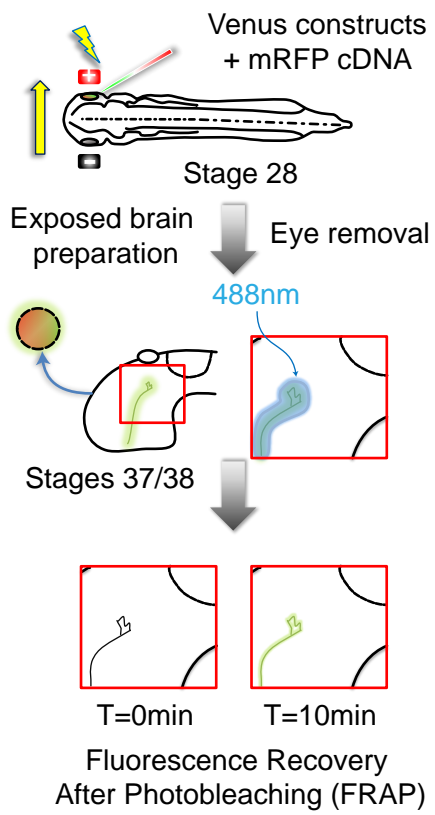

C

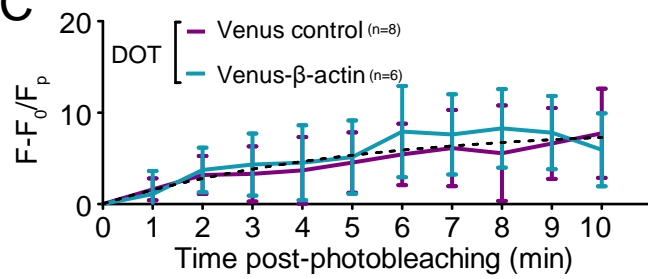

B

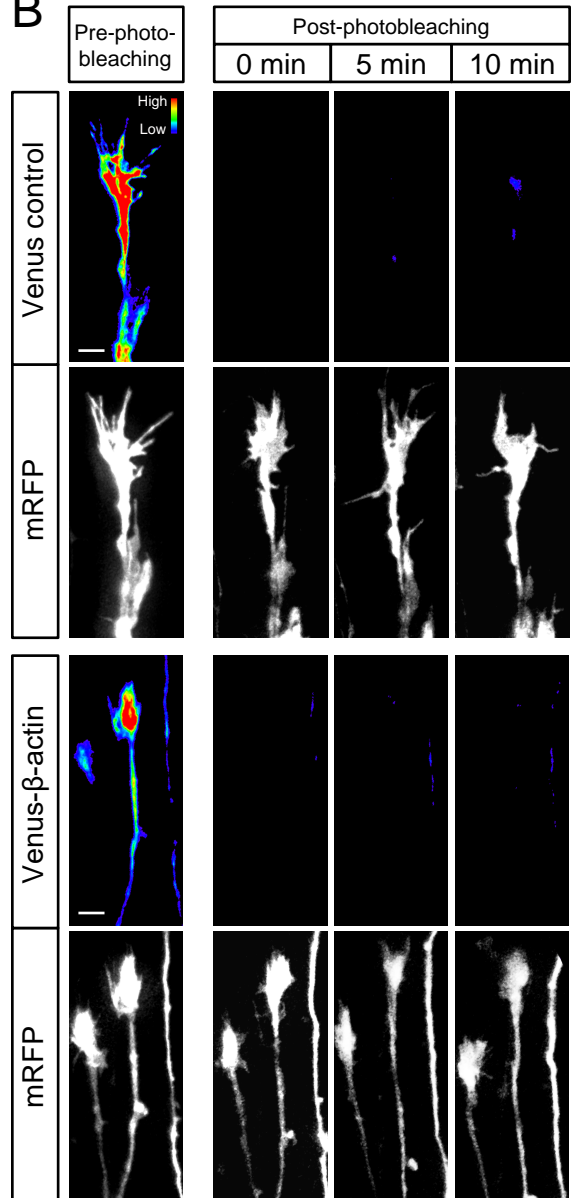

Figure S7

**Figure S7. Related to Figure 6. Local  $\beta$ -actin Synthesis Is Not Detected in Growth Cones Navigating the Optic Tract**

(A) Experimental design of fluorescence recovery after photobleaching experiment of Venus-constructs in the optic tract *in vivo*. Electroporated eye was removed to eliminate somatic contribution of cytoplasmic material. OT, optic tract. (B) Fluorescence heatmaps illustrating that limited recoveries were detected with both the Venus control and Venus- $\beta$ -actin constructs. (C) Line graph showing the recovery of Venus signals after photobleaching over the course of 10 minutes. Dotted line represents least-squares fit to a single-exponential function; note that a single model is highly adequate for fitting both conditions (Venus control vs. Venus- $\beta$ -actin:  $F_{3,148}=0.15$ ,  $p=0.93$ , Extra sum-of-squares F test). Error bars represent SEM. Scale bars, 5 $\mu$ m.
